# Supplementary material for: Iron oxide nanoparticles immobilized to mesoporous NH2-SiO2spheres by sulfonic acid functionalization as highly efficient catalysts
Source: Royal Society of Chemistry journal article supplement (doi:10.1039/c4nr05884d), 2014-11-19
Supplement: c4nr05884d1.pdf [file c4nr05884d1.pdf]

## Supporting Information

# Iron Oxides Nanoparticles Immobilized to Mesoporous NH<sub>2</sub>- SiO<sub>2</sub> Spheres by Sulfonic Acid Functionalization as Highly Efficient Catalysts

Guoliang Zhang,<sup>\*a</sup> Lei Qin,<sup>a</sup> Yujiao Wu,<sup>a</sup> Zehai Xu<sup>a</sup> and Xinwen Guo<sup>b</sup>

<sup>a</sup> *Institute of Oceanic and Environmental Chemical Engineering, College of Chemical Engineering  
and Material Science, Zhejiang University of Technology, Hangzhou 310014, China*

<sup>b</sup> *State Key Laboratory of Fine Chemicals, Department of Catalysis Chemistry and Engineering,  
Dalian University of Technology, Dalian 116012, China*

Tel/Fax: 86-571-88320863; E-mail: [guoliangz@zjut.edu.cn](mailto:guoliangz@zjut.edu.cn)

**Table S1 BET surface area and textural data for synthesized different samples**

| Sample                                  | SBET<br>(m <sup>2</sup> /g) | SLangmuir<br>(m <sup>2</sup> /g) | SBJH<br>(m <sup>2</sup> /g) | Vmeso<br>(cm <sup>3</sup> /g) | Average pore<br>diameter (nm) |
|-----------------------------------------|-----------------------------|----------------------------------|-----------------------------|-------------------------------|-------------------------------|
| AMAS                                    | 287.63                      | 181.52                           | 450.83                      | 0.61                          | 8.49                          |
| SA-AMAS                                 | 321.13                      | 294.04                           | 420.46                      | 0.52                          | 6.51                          |
| Fe <sub>2</sub> O <sub>3</sub> /SA-AMAS | 174.12                      | 153.12                           | 227.55                      | 0.23                          | 5.39                          |

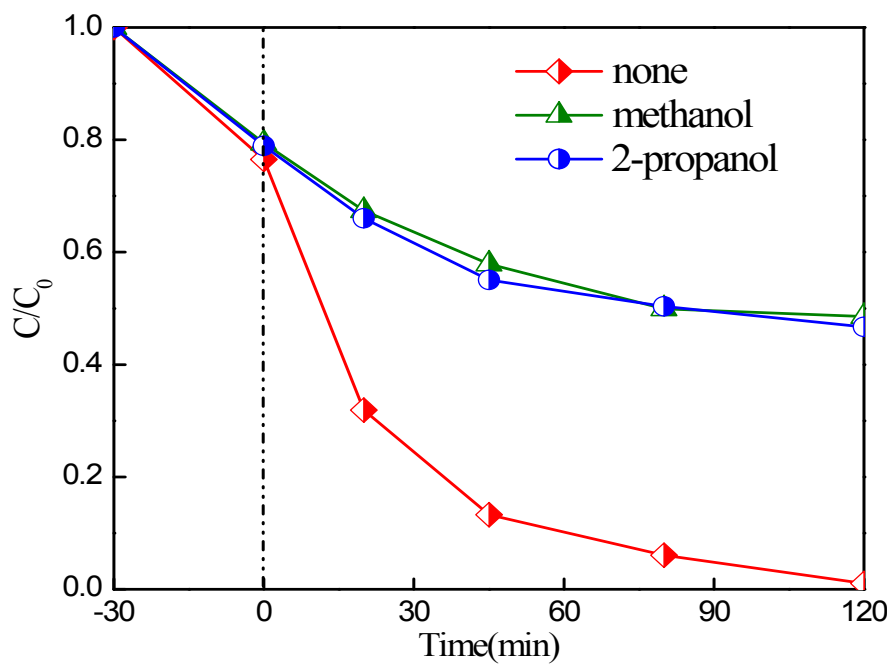

Fig. S1 Effect of methanol and 2-propanol on degradation X-3B by using  $\text{Fe}_2\text{O}_3/\text{SA-AMAS}$  as catalyst. ( $T=298\text{ K}$ ,  $\text{pH}=6.0$ ,  $C_{\text{cat}}=0.5\text{ g}\cdot\text{l}^{-1}$ ,  $C_{\text{X-3B},0}=100\text{ m g}\cdot\text{l}^{-1}$ ,  $C_{\text{H}_2\text{O}_2,0}=5.0\text{ mM}$ ; methanol: 10 mM; 2-propanol: 10 mM)

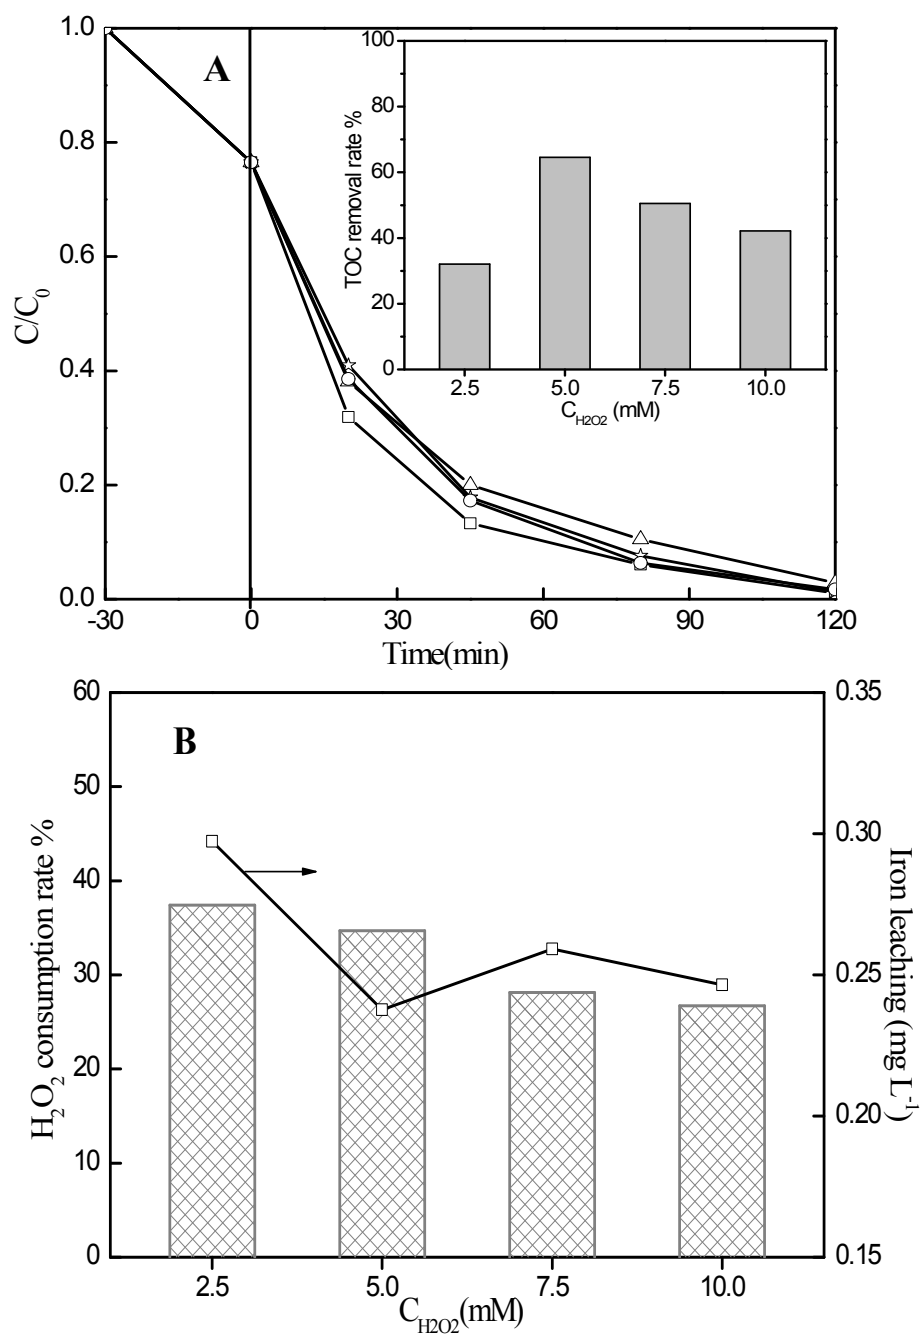

**Fig. S2** Effect of  $H_2O_2$  dosage on the degradation and TOC removal rate of X-3B (A),  $H_2O_2$  decomposition and iron leaching (B) ( $T = 298$  K, initial  $pH = 6.0$ ,  $C_{Cat.} = 0.5$   $g \cdot l^{-1}$ ,  $C_{X-3B,0} = 100$   $m g \cdot l^{-1}$ ).  $\Delta$  2.5 mM  $\square$  5.0 mM  $\star$  7.5 mM  $\circ$  10.0 mM

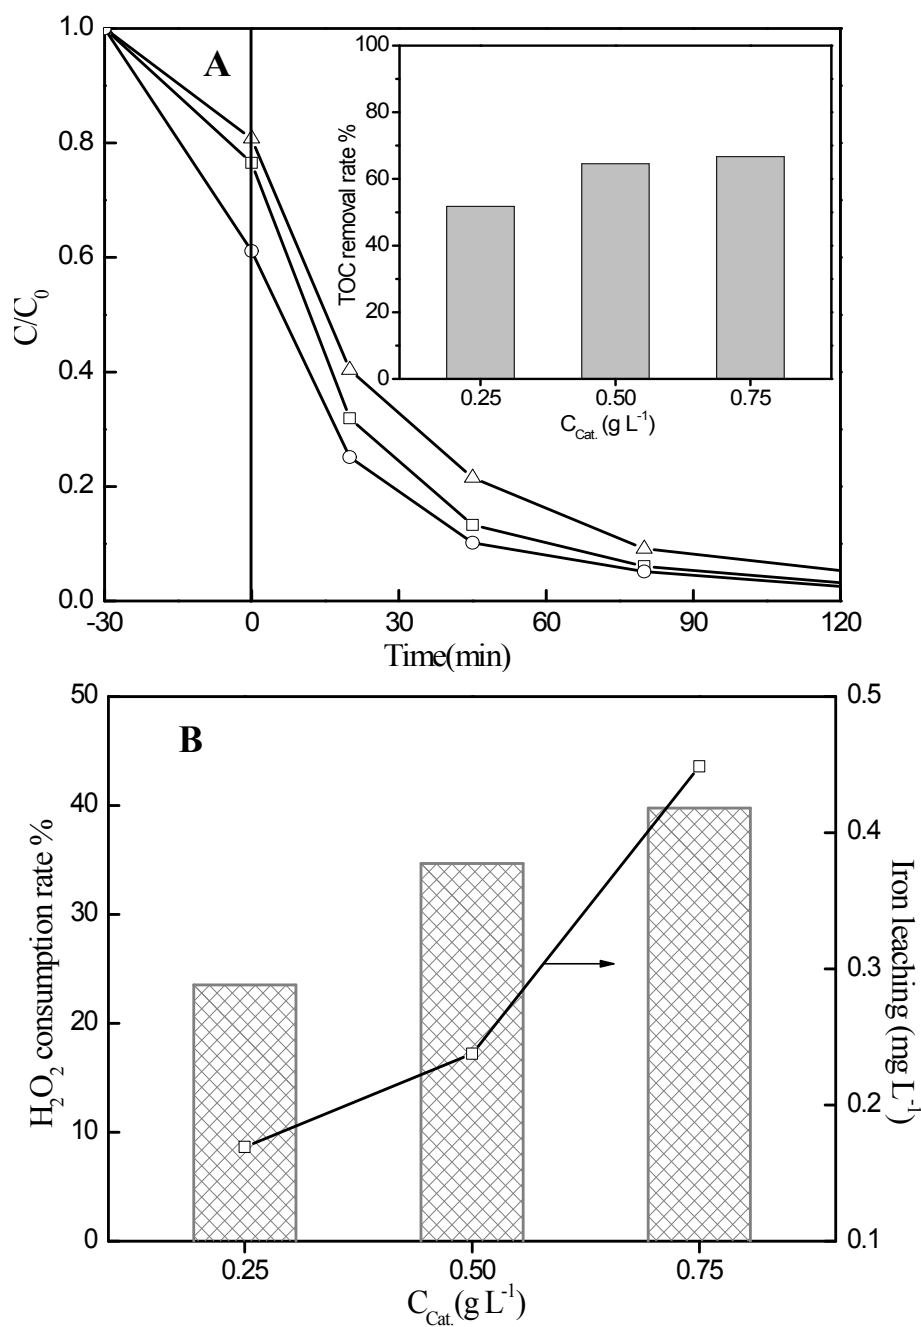

**Fig. S3** Effect of catalyst loading on the degradation and TOC removal rate of X-3B (A), H<sub>2</sub>O<sub>2</sub> decomposition and iron leaching (B) (T = 298 K, initial pH = 6.0,  $C_{X-3B,0} = 100 \text{ mg} \cdot \text{L}^{-1}$ ,  $C_{H_2O_2,0} = 5.0 \text{ mM}$ ).  $\Delta$  0.25 g·l<sup>-1</sup>  $\square$  0.50 g·l<sup>-1</sup>  $\circ$  0.75 g·l<sup>-1</sup>

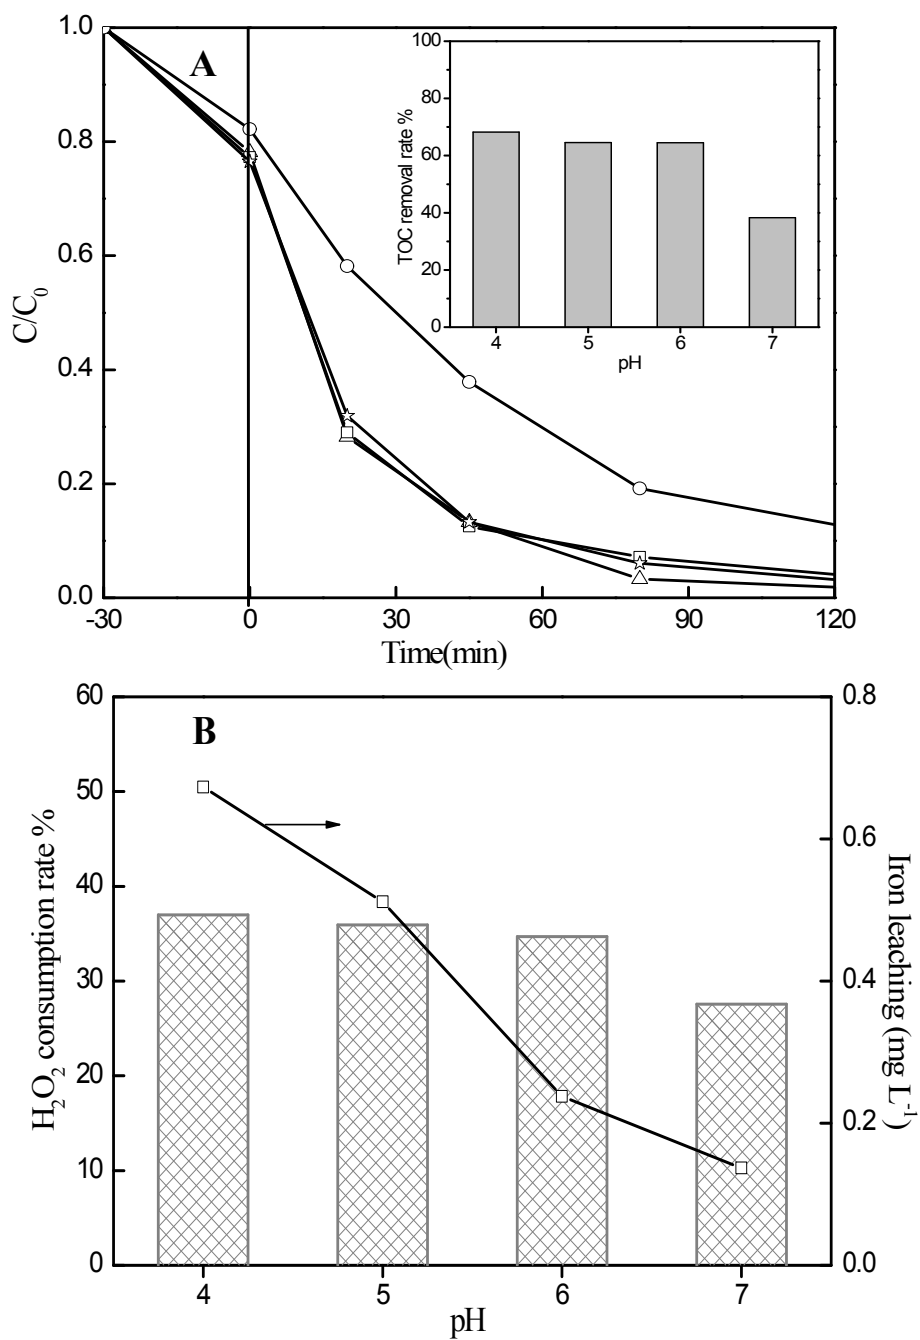

**Fig. S4** Effect of initial pH value on the degradation and TOC removal rate of X-3B (A),  $H_2O_2$  decomposition and iron leaching (B) ( $T = 298 \text{ K}$ ,  $C_{\text{cat.}} = 0.5 \text{ g} \cdot \text{l}^{-1}$ ,  $C_{\text{X-3B}, 0} = 100 \text{ mg} \cdot \text{l}^{-1}$ ,  $C_{\text{H}_2\text{O}_2, 0} = 5.0 \text{ mM}$ ).  $\Delta$  4.0  $\square$  5.0  $\star$  6.0  $\circ$  7.0

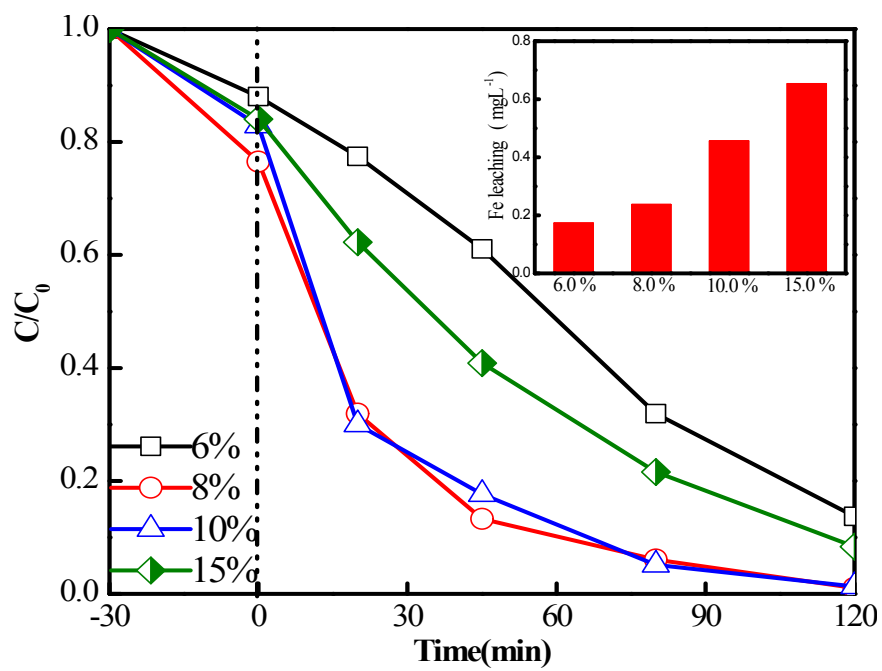

**Fig. S5** Effect of Fe loading amount on the catalytic reactivity and the concentration of leached Fe ions for the catalyst in the reaction processes.

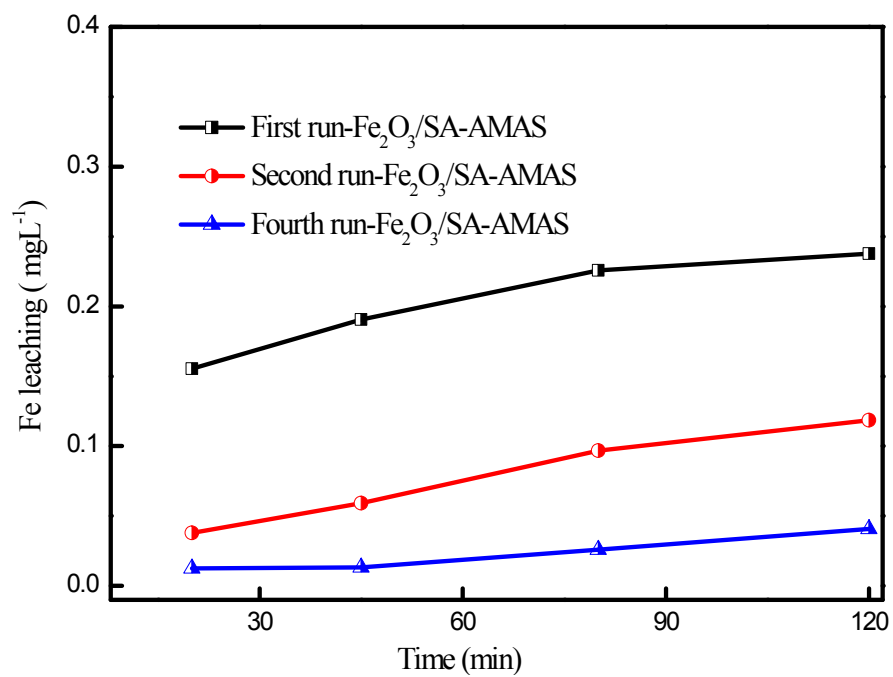

**Fig. S6** Concentrations of leached Fe for the catalyst in the reaction processes.



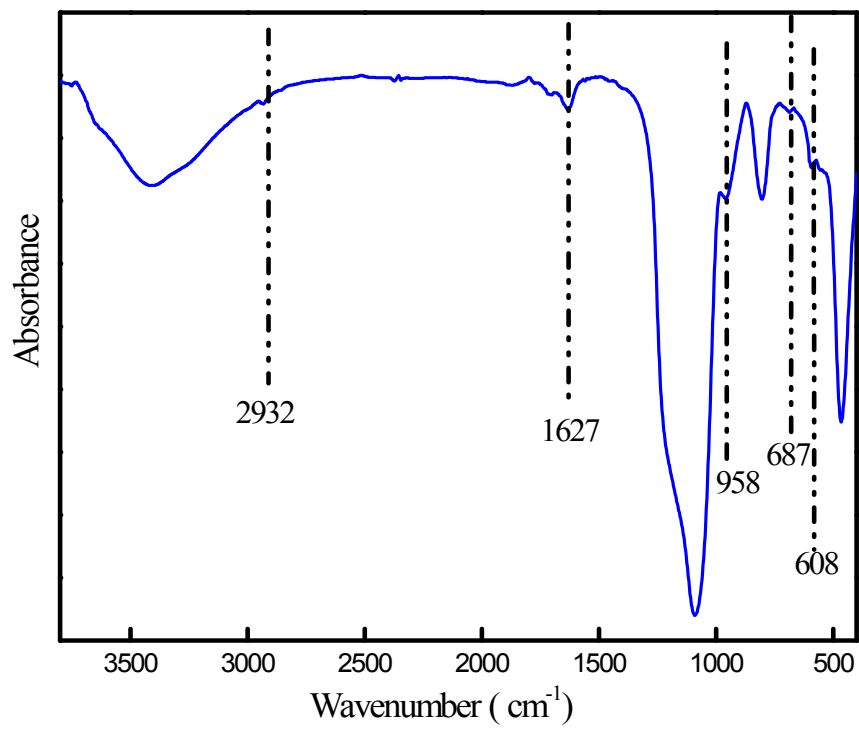

**Fig. S7** FTIR spectra of Fe<sub>2</sub>O<sub>3</sub>/SA-AMAS used after three cycles.

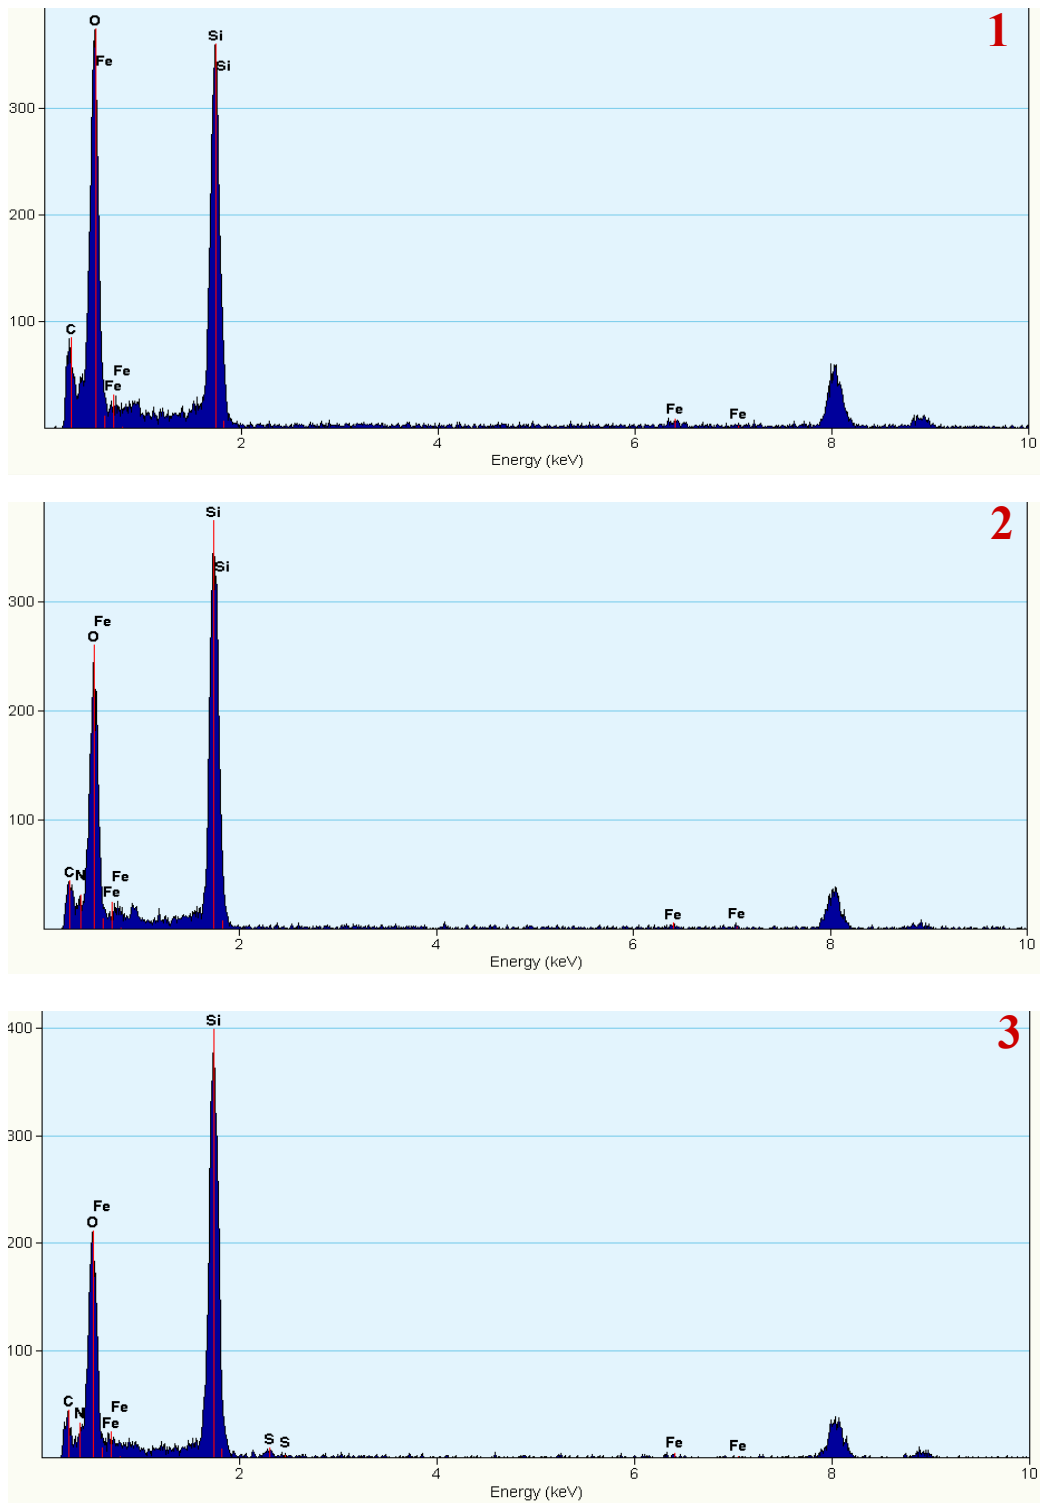

**Fig. S8** Element analysis of Fe<sub>2</sub>O<sub>3</sub>/AMS (a), Fe<sub>2</sub>O<sub>3</sub>/AMAS (b), and Fe<sub>2</sub>O<sub>3</sub>/SA-AMAS (c) at three points.
